# Supplementary material
Source: PubMed Central journal article supplement (PMC1913812)
Supplement: plntphys_pp.106.095299_1.pdf [file plntphys_pp.106.095299_1.pdf]

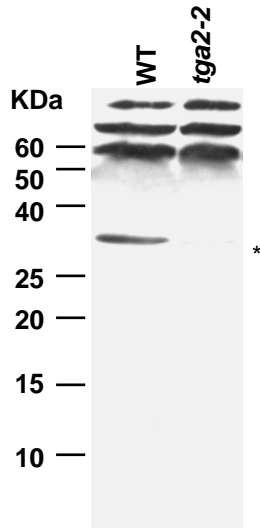

**Supplemental Figure S1. Western blot of TGA2 in *tga2-2* mutant.**

The total protein extract from WT and *tga2-2* mutant seedlings were separated on 12% SDS PAGE gel. The western blot was probed with  $\alpha$ TGA2 antibody generated from the N-terminus of TGA2. The asterisk shows the position of full-length TGA2. The top three bands are non-specific proteins recognized by the antibody. The molecular mass is shown on the left.

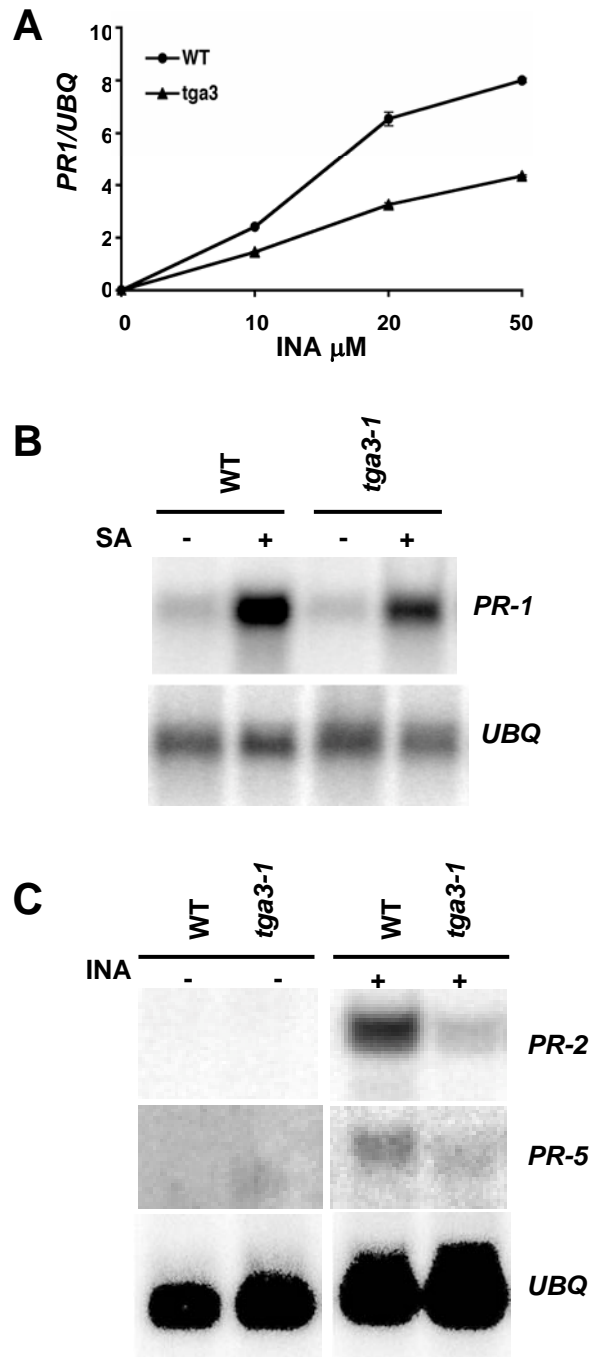

**Supplemental Figure S2. Expression of PR genes in *tga3-1*:**

A, Relative expression of *PR-1* at different concentrations of INA. RNA from two-week-old seedlings grown in the presence or absence for INA was isolated. The transcript levels were analyzed by real time RT-PCR. The Y-axis values were normalized to the UBQ5 expression levels. The error bars show standard error. The experiment was repeated three times with similar results. B, Northern blot showing expression of *PR-1* in response to 1 mM salicylic acid (SA). Four-week-old plants were sprayed with 1 mM SA. Tissue was harvested 48 hrs post induction.

The RNA blot was first probed with *PR-1*. For the loading control same blot was stripped and re-probed with UBQ. C, Northern blot of WT and *tga3-1* mutant probed with *PR-2* and *PR-5*. Total RNA was extracted from two-week-old seedling grown on MS agar plates with (+) or without (-) INA (20  $\mu$ M). *PR-2* and *PR-5* expression levels were analyzed by hybridizing an RNA blot with respective gene specific probes. A ubiquitin specific probe was used to hybridize the same blot as a loading control.

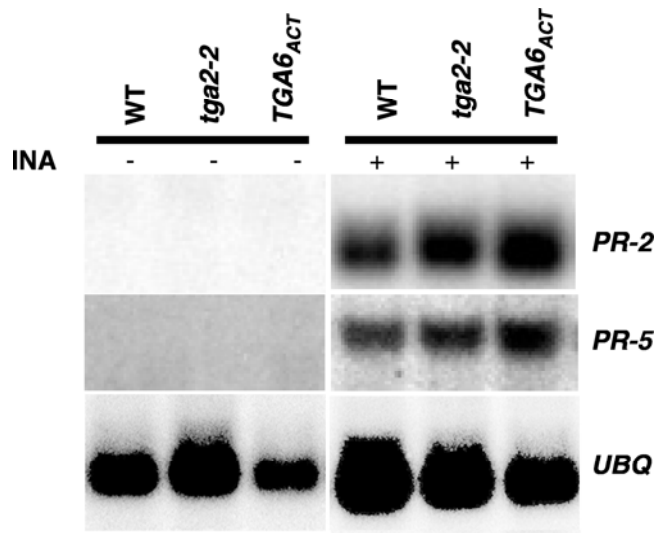

**Supplemental Figure S3. Expression of *PR* genes in *tga2-2* and *TGA6<sub>ACT</sub>***

Northern blot of WT, *tga2-2* and *TGA6<sub>ACT</sub>* mutant probed with *PR-2* and *PR-5*, Total RNA was extracted from two-week-old seedlings grown on MS plates with (+) or without (-) INA (20  $\mu$ M). *PR-2* and *PR-5* expression levels were analyzed by hybridizing an RNA blot with respective gene specific probes. A ubiquitin specific probe was used to hybridize the same blot as a loading control.

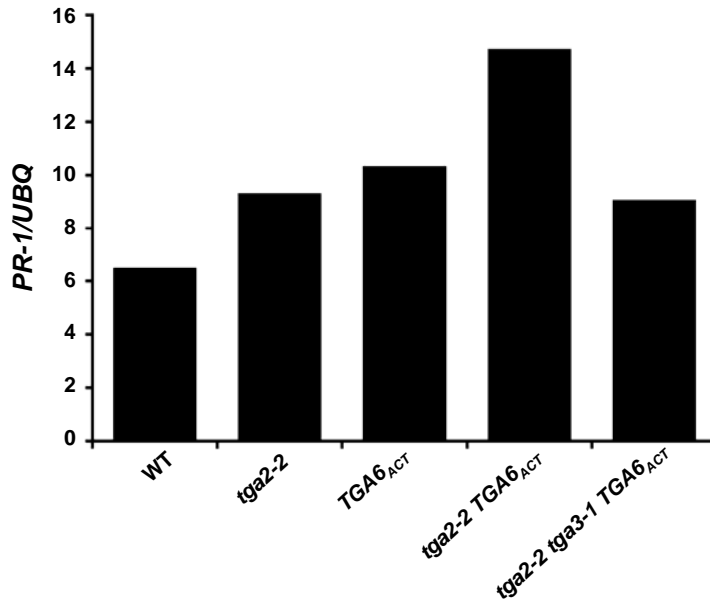

**Supplemental Figure S4. Relative expression of *PR-1* in *tga2-2 TGA6<sub>ACT</sub>* and *tga2-2 tga3-1 TGA6<sub>ACT</sub>***  
RNA from two-week-old seedlings grown on MS agar plates containing 20  $\mu$ M INA were isolated. The transcript levels were analyzed by real time RT-PCR. The Y-axis values were normalized to the UBQ expression levels.

**A**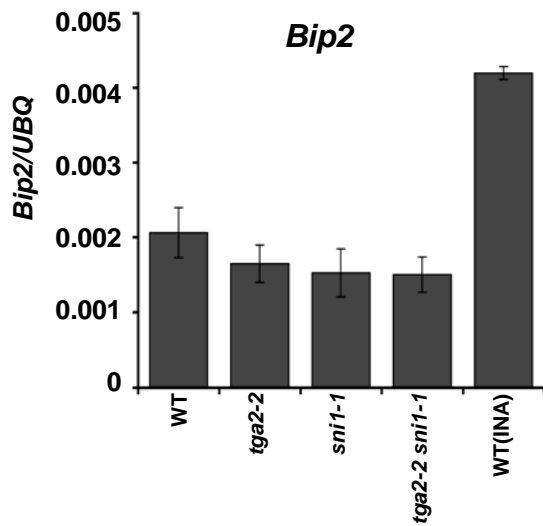**B**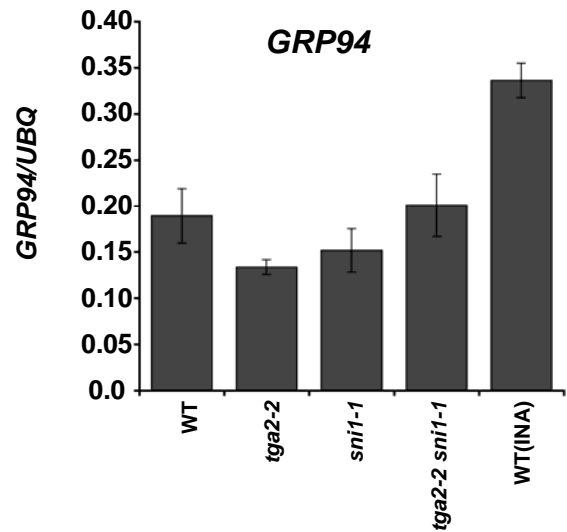

**Supplemental Figure S5. Expression of *Bip2* and *GRP94* in *tga2-2 snf1-1* mutant**  
RNA from two-week-old seedlings grown on MS agar plates were isolated. WT seedlings were also grown in presence of 20  $\mu$ M INA. The transcript levels were analyzed by real time RT-PCR. The Y-axis values were normalized to the UBQ expression levels. The error bars are standard error.
