# Supplementary material
Source: PubMed Central journal article supplement (PMC1913812)
Supplement: plntphys_pp.106.095299_2.pdf [file plntphys_pp.106.095299_2.pdf]

## **Supplemental Materials and Method:**

### **Western blot analysis**

The protein extracts from WT and *tga2-2* plants were prepared from two-week-seedlings grown on MS plates. The protein extraction and western blot analysis was carried out as described in (Kinkema et al., 2000). The blot was probed with  $\alpha$ TGA2 antibody (Johnson et al., 2003) after washes, the blot was probed with secondary antibody conjugated with horseradish peroxidase. The antibody bound protein was detected by a chemiluminescence reaction using SuperSignal kit (Pierce).

### **Supplemental References**

**Johnson C, Boden E, Arias J** (2003) Salicylic acid and NPR1 induce the recruitment of trans-activating TGA factors to a defense gene promoter in Arabidopsis. *Plant Cell* **15**: 1846-1858

**Kinkema M, Fan W, Dong X** (2000) Nuclear localization of NPR1 is required for activation of PR gene expression. *Plant Cell* **12**: 2339-2350
